# Supplementary material for: Evolution of an archaeal virus nucleocapsid protein from the CRISPR-associated Cas4 nuclease
Source: PubMed Central journal article supplement (PMC4625639; doi:10.1186/s13062-015-0093-2), 2015-10-29
Supplement: 13062_2015_93_MOESM1_ESM.pdf [file 13062_2015_93_MOESM1_ESM.pdf]

A.

```
>PHA00619 CRISPR-associated Cas4-like protein
  Probab=94.53 E-value=0.078 Score=42.16 Aligned_cols=78 Identities=27% Similarity=0.323 Sum_probs=0.0

Q ss_pred          eECCcccccccccc-cCchHHHHHhhc-CccccHHHHHHccccHHHHHHHHCCcccc-----Chhh
Q Wed_Aug_26_18:  11 YTIDENKEINSISAAD-TICPYRAYRSYHRKI-PIKIDCKEARKIAGSMTHYVILRQLKEQGCTEKIV-----DPEL 82 (113)
Q Consensus        11 ytidenkeinsisaad-ticpyrayrsyhrki-pikiddckearkiagsmthyvilrqlkeggcetekiv-----dpel 82 (113)
T Consensus        12 |.+++.+.+.|-+|. |.|-++| | -++| |.+++.-.---+|.+.|-+--|++|.|+|. |      +.++
T PHA00619         12 YEIVSQNDLQTIWVTELSRCLRRSW--LMRKNGGVKLALEEAMKMHIGSGLHMRLQRILKKHGFTECRVERKTALGFEI 89 (201)
T ss_pred          HhhcccCCCCEEEEehhhCccHHH--HHHCCccccchhHHHHhHHHHHHHHHHHHCCeeEEEEEEcCCcEE
```

B.

```
>4ic1_A CAS4, crispr, MCSG, exonuclease, PSI-biology, structural GEN unknown function; 2.35A {Sulfolobus solfataricus}
  Probab=96.31 E-value=0.0049 Score=40.81 Aligned_cols=67 Identities=24% Similarity=0.339 Sum_probs=0.0

Q ss_pred          eEEcccccccEEEEcCceEEEEcChHHHhHHHHHHHHHHhCchhhhhcCceeehhhhhhhhcccc
Q Thu_Aug_27_19:  2 YIALAGAERGHLYINNGIRTTIQMDEEERVKITEYVRNLIRRIKNGEAVEERNRGIWCNICEFKAECNHKL 73 (74)
Q Consensus        2 yialagaerghliy-inngirttiqmdeeervkiteyvrnlirrikngeaveernrgiwcnicefkaecnkl 73 (74)
T Consensus        139 Y~~~~~g~l~y~~~~~l~~~~~i~~~~~i~~~~~P~~~~~C~~~~~C~~~~~C~~~~~
T 4ic1_A           139 YLWLFSAEKGILVYITPDRIAETINEPLDEAT---IVRLAEDTIMLQNSP--RFNWECKYCIFSVICPAKL 205 (206)
T ss_dssp          HHHHHCSEEEEEETEEEEEECCCCHHH---HHHHHHHHTTCSSS--SSTTSGGGCTTGGGCTCC
T ss_pred          HHHHHhcCcEEEEcCceEEEEcCchHHH---HHHHHHHHhCCCC--CCCCCCCCCCCCcCCc
```

```
>PHA00619 CRISPR-associated Cas4-like protein
  Probab=93.46 E-value=0.14 Score=38.31 Aligned_cols=67 Identities=19% Similarity=0.303 Sum_probs=0.0

Q ss_pred          eEEcccccccEEE-EcCceEEEEcChHHHhHHHHHHHHHHhCchhhhhc-Cceeehhhhhhhh
Q Thu_Aug_27_19:  2 YIALAGAERGHLY-INNGIRTTIQMDEEERVKITEYVRNLIRRIKNGEAVEERN-RGIWCNICEFKAEC 69 (74)
Q Consensus        2 yialagaerghliy-inngirttiqmdeeervkiteyvrnlirrikngeaveern-rgiwcnicefkaec 69 (74)
T Consensus        129 Yl~l~l~l~G~L~V~d~d~e~v~d~e~e~l~l~l~l~p~p~p~C~C~f~C 197 (201)
T PHA00619         129 YIEMANAMAGYLIVHADGRVEEIK-RDWSETDLENRANAFGISVEENILPPKSKPDSECICPFYNVC 197 (201)
T ss_pred          HHHHHHCCEEEEECCCCeEEec-CchHHHHHHHHHHHHhccccCCCCCCCCCCCCchhc
```

**Figure S1.** Results of the HHpred search seeded with TP1 (A) and gp7 (B) sequences. H(h),  $\alpha$ -helix; E(e),  $\beta$ -strand; C(c), coil.
